# Supplementary material for: In silico design, synthesis, characterization and pharmacological evaluation of captopril conjugates in the treatment of renal fibrosis
Source: Royal Society of Chemistry journal article supplement (doi:10.1039/c8nj03836h), 2018-11-14
Supplement: c8nj03836h1.zip [file ACT ATR.pdf › SPECTRAL DATA/ACT ATR.pdf]

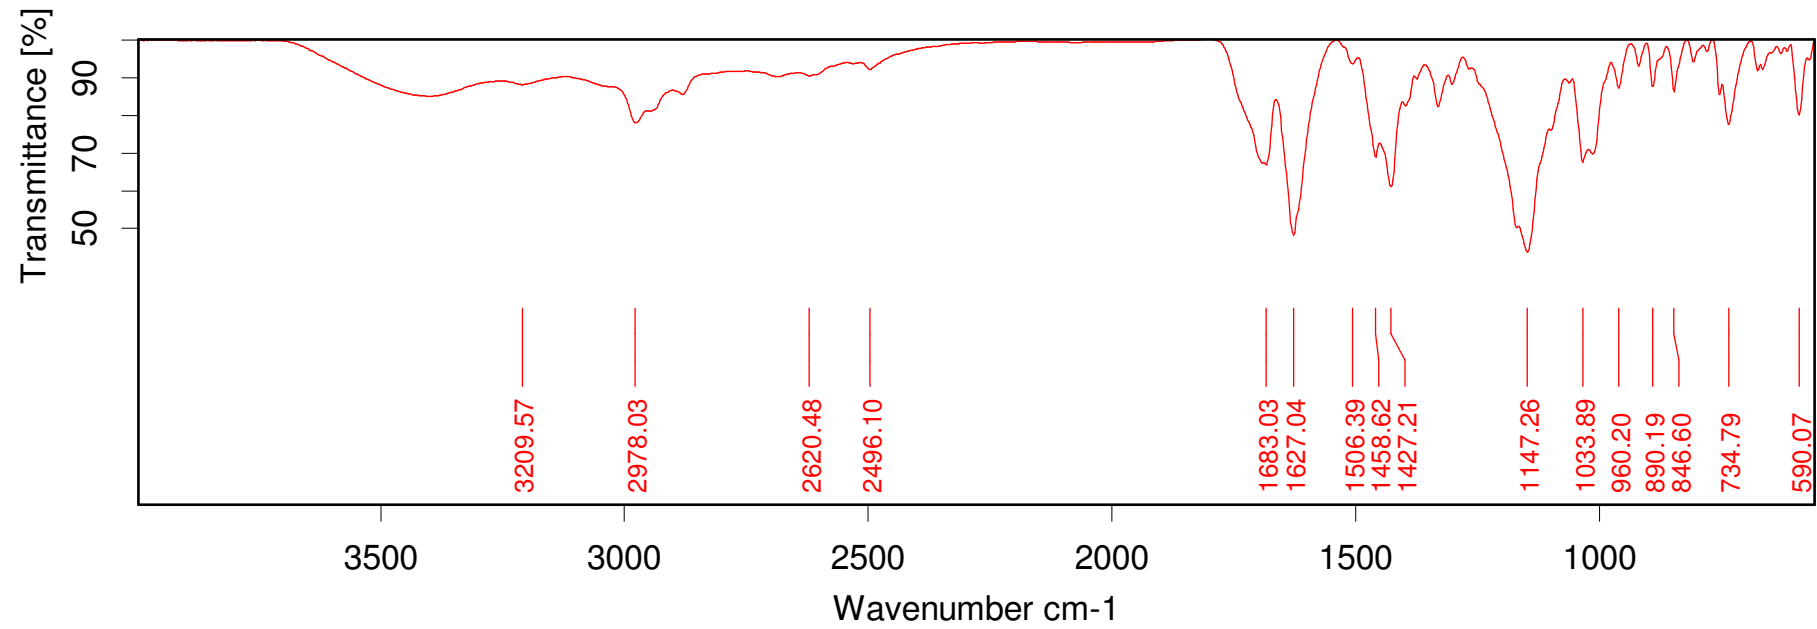

D:\FTIR DATA\A V MOHOLKAR\ACT 600.0

ACT 600

10/20/2015

|                          |                      |
|--------------------------|----------------------|
| Data Parameters TR       | Values               |
| Data Point Format        | 1                    |
| Number of Data Points    | 1687                 |
| Frequency of First Point | 3996.733932          |
| Frequency of Last Point  | 558.727091           |
| Y - Scaling Factor       | 1.000000             |
| Y - Maximum              | 1.001910             |
| Y - Minimum              | 0.438226             |
| Date of Measurement      | 20/10/2015           |
| Time of Measurement      | 17:41:19.470 (GMT+5) |
| X Units                  | Wavenumber cm-1      |
