# Supplementary material for: In silico design, synthesis, characterization and pharmacological evaluation of captopril conjugates in the treatment of renal fibrosis
Source: Royal Society of Chemistry journal article supplement (doi:10.1039/c8nj03836h), 2018-11-14
Supplement: c8nj03836h1.zip [file ACT HRMS.pdf › SPECTRAL DATA/ACT HRMS.pdf]

# Savitribai Phule Pune University - Central Instrumentation Facility

## Analysis Info

|               |                                                                                |
|---------------|--------------------------------------------------------------------------------|
| Analysis Name | D:\Data\2017\JUNE\SPPU AFFILIATED\SP COLLEGE, PUNE\PC MHASKE\ ACT_BC4_01_252.d |
| Method        | dlc-ms600mz_10min.m                                                            |
| Sample Name   | ACT                                                                            |
| Comment       |                                                                                |

Acquisition Date 7/5/2017 2:52:17 PM  
 Operator CIF  
 Instrument impact HD 1819699.81189

## Acquisition Parameter

|             |         |                      |          |                  |           |
|-------------|---------|----------------------|----------|------------------|-----------|
| Source Type | ESI     | Ion Polarity         | Positive | Set Nebulizer    | 1.7 Bar   |
| Focus       | Active  | Set Capillary        | 4500 V   | Set Dry Heater   | 200 °C    |
| Scan Begin  | 50 m/z  | Set End Plate Offset | -500 V   | Set Dry Gas      | 7.0 l/min |
| Scan End    | 600 m/z | Set Charging Voltage | 2000 V   | Set Divert Valve | Waste     |
|             |         | Set Corona           | 0 nA     | Set APCI Heater  | 0 °C      |

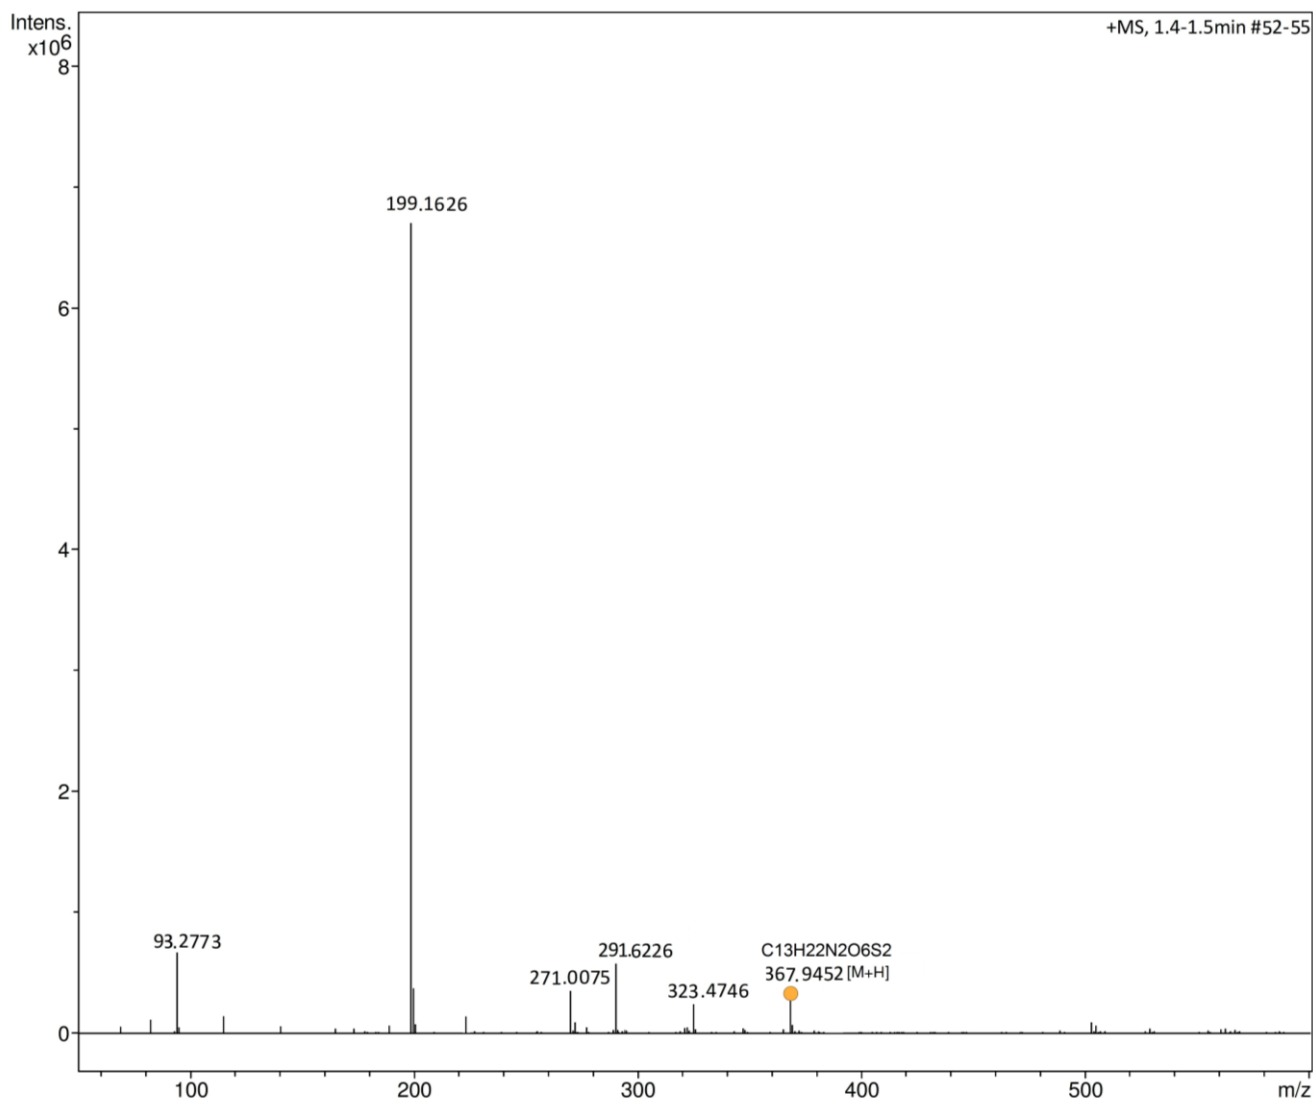

| Meas. m/z | # | Ion Formula                                                                  | Score  | m/z       | err [mDa] | err [ppm] | mSigma | rdb | e <sup>-</sup> | Conf | N-Rule | Adduct |
|-----------|---|------------------------------------------------------------------------------|--------|-----------|-----------|-----------|--------|-----|----------------|------|--------|--------|
| 367.94523 | 1 | C <sub>13</sub> H <sub>22</sub> N <sub>2</sub> O <sub>6</sub> S <sub>2</sub> | 100.00 | 367.94528 | 1.5       | 2.3       | 35.8   | 3.8 | even           |      | ok     | M+H    |
