# Supplementary material for: In silico design, synthesis, characterization and pharmacological evaluation of captopril conjugates in the treatment of renal fibrosis
Source: Royal Society of Chemistry journal article supplement (doi:10.1039/c8nj03836h), 2018-11-14
Supplement: c8nj03836h1.zip [file ACT NMR.pdf › SPECTRAL DATA/ACT NMR.pdf]

A-C-T

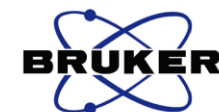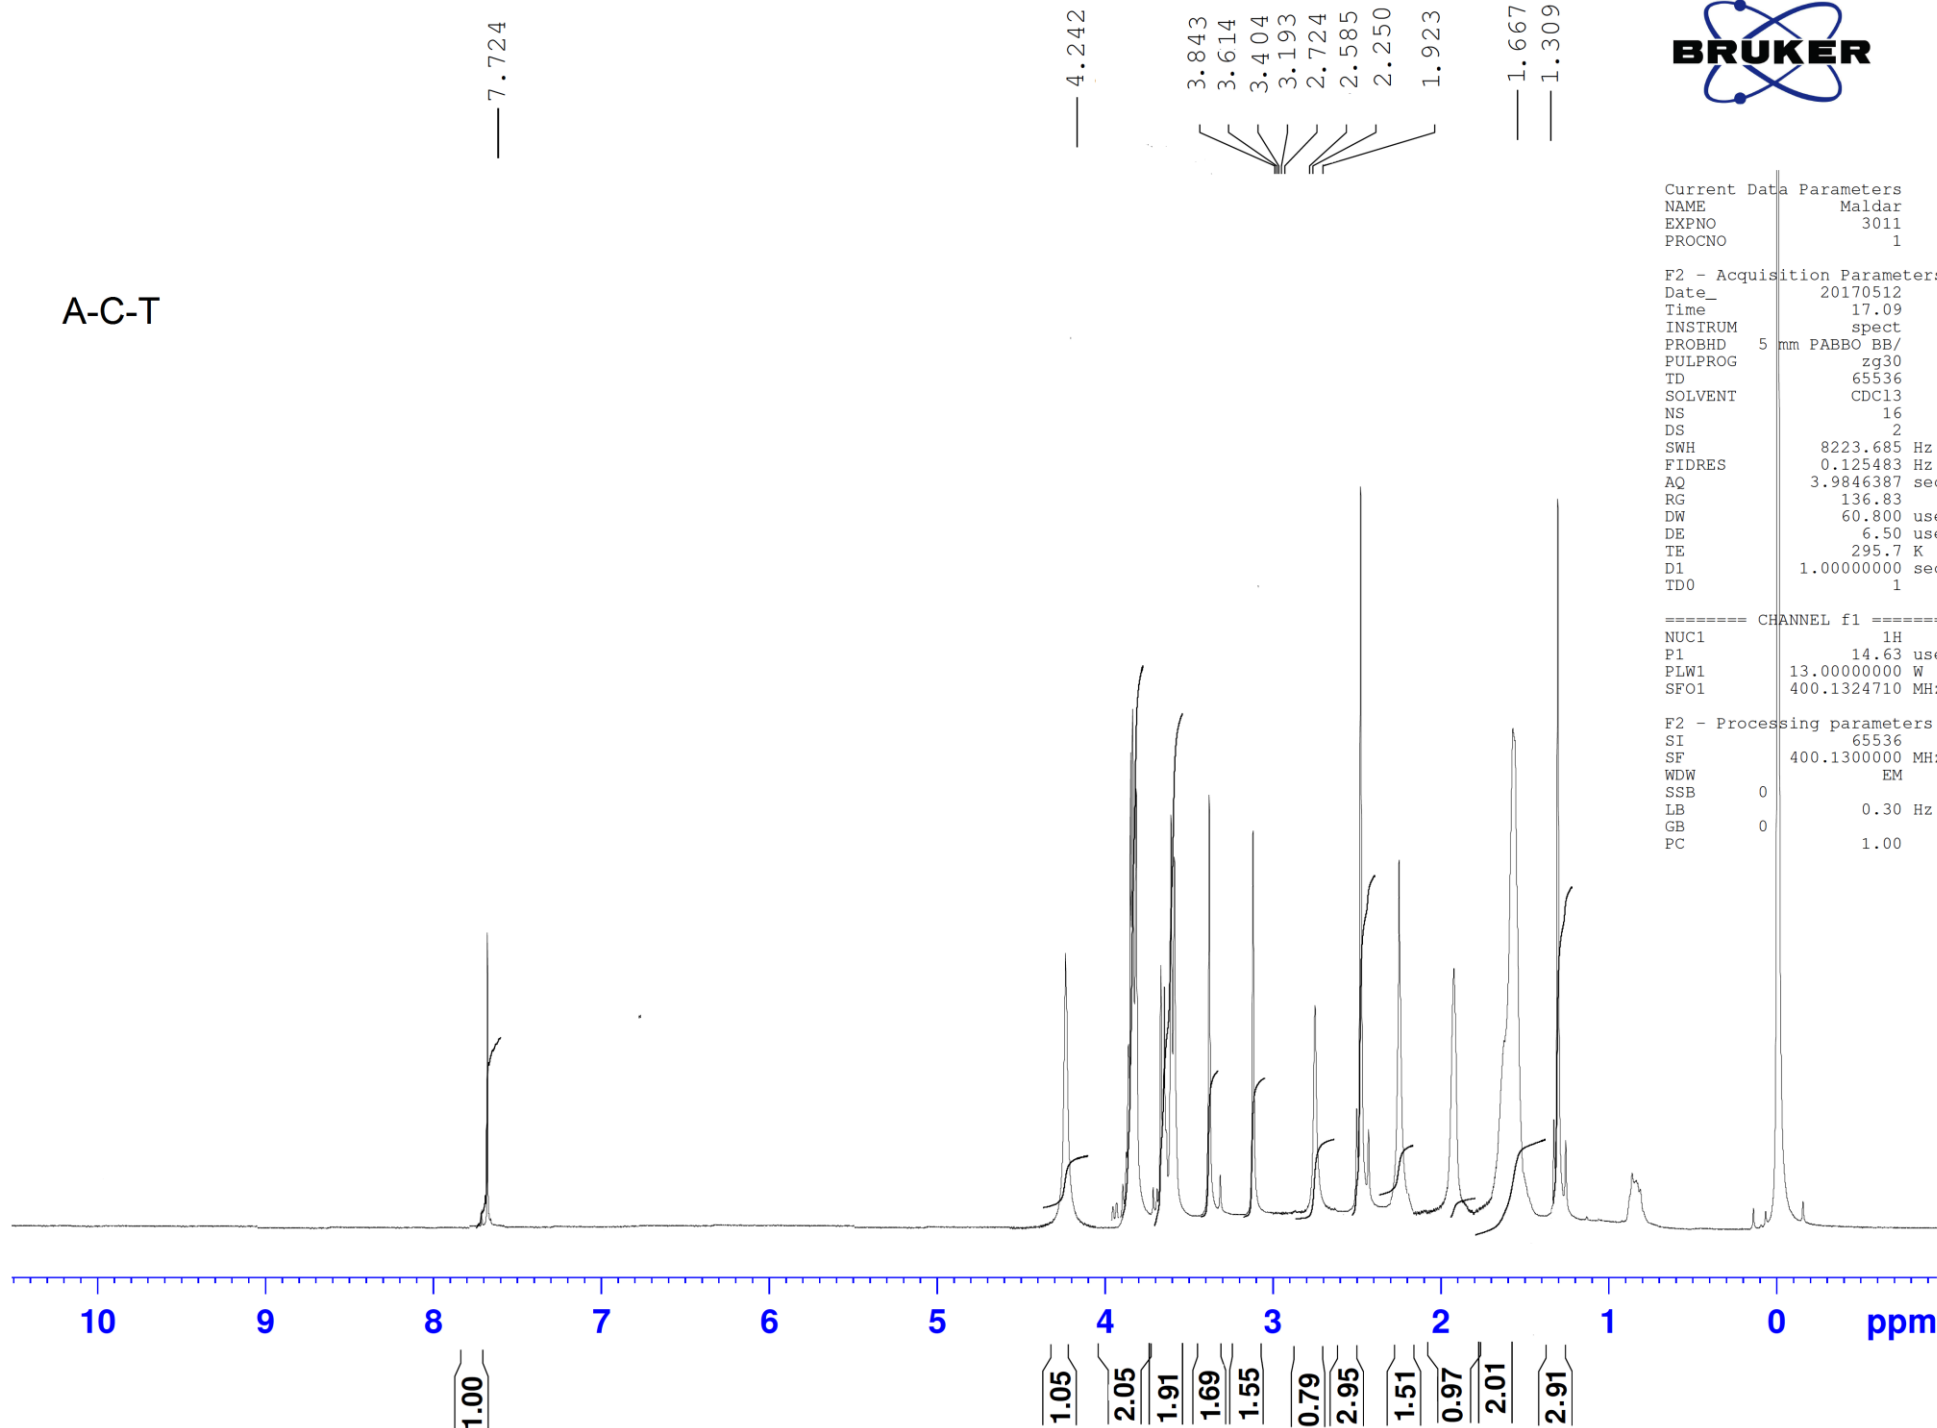

```

Current Data Parameters
NAME      Maldar
EXPNO     3011
PROCNO    1

F2 - Acquisition Parameters
Date_     20170512
Time      17.09
INSTRUM   spect
PROBHD    5 mm PABBO BB/
PULPROG   zg30
TD        65536
SOLVENT   CDCl3
NS         16
DS         2
SWH        8223.685 Hz
FIDRES     0.125483 Hz
AQ         3.9846387 sec
RG         136.83
DW         60.800 usec
DE         6.50 usec
TE         295.7 K
D1         1.00000000 sec
TD0        1

===== CHANNEL f1 =====
NUC1       1H
P1         14.63 usec
PLW1       13.00000000 W
SFO1       400.1324710 MHz

F2 - Processing parameters
SI         65536
SF         400.1300000 MHz
WDW        EM
SSB        0
LB         0.30 Hz
GB         0
PC         1.00
  
```
