# Supplementary figures and images for: In silico design, synthesis, characterization and pharmacological evaluation of captopril conjugates in the treatment of renal fibrosis
Source: Royal Society of Chemistry journal article supplement (doi:10.1039/c8nj03836h), 2018-11-14

A-C-G

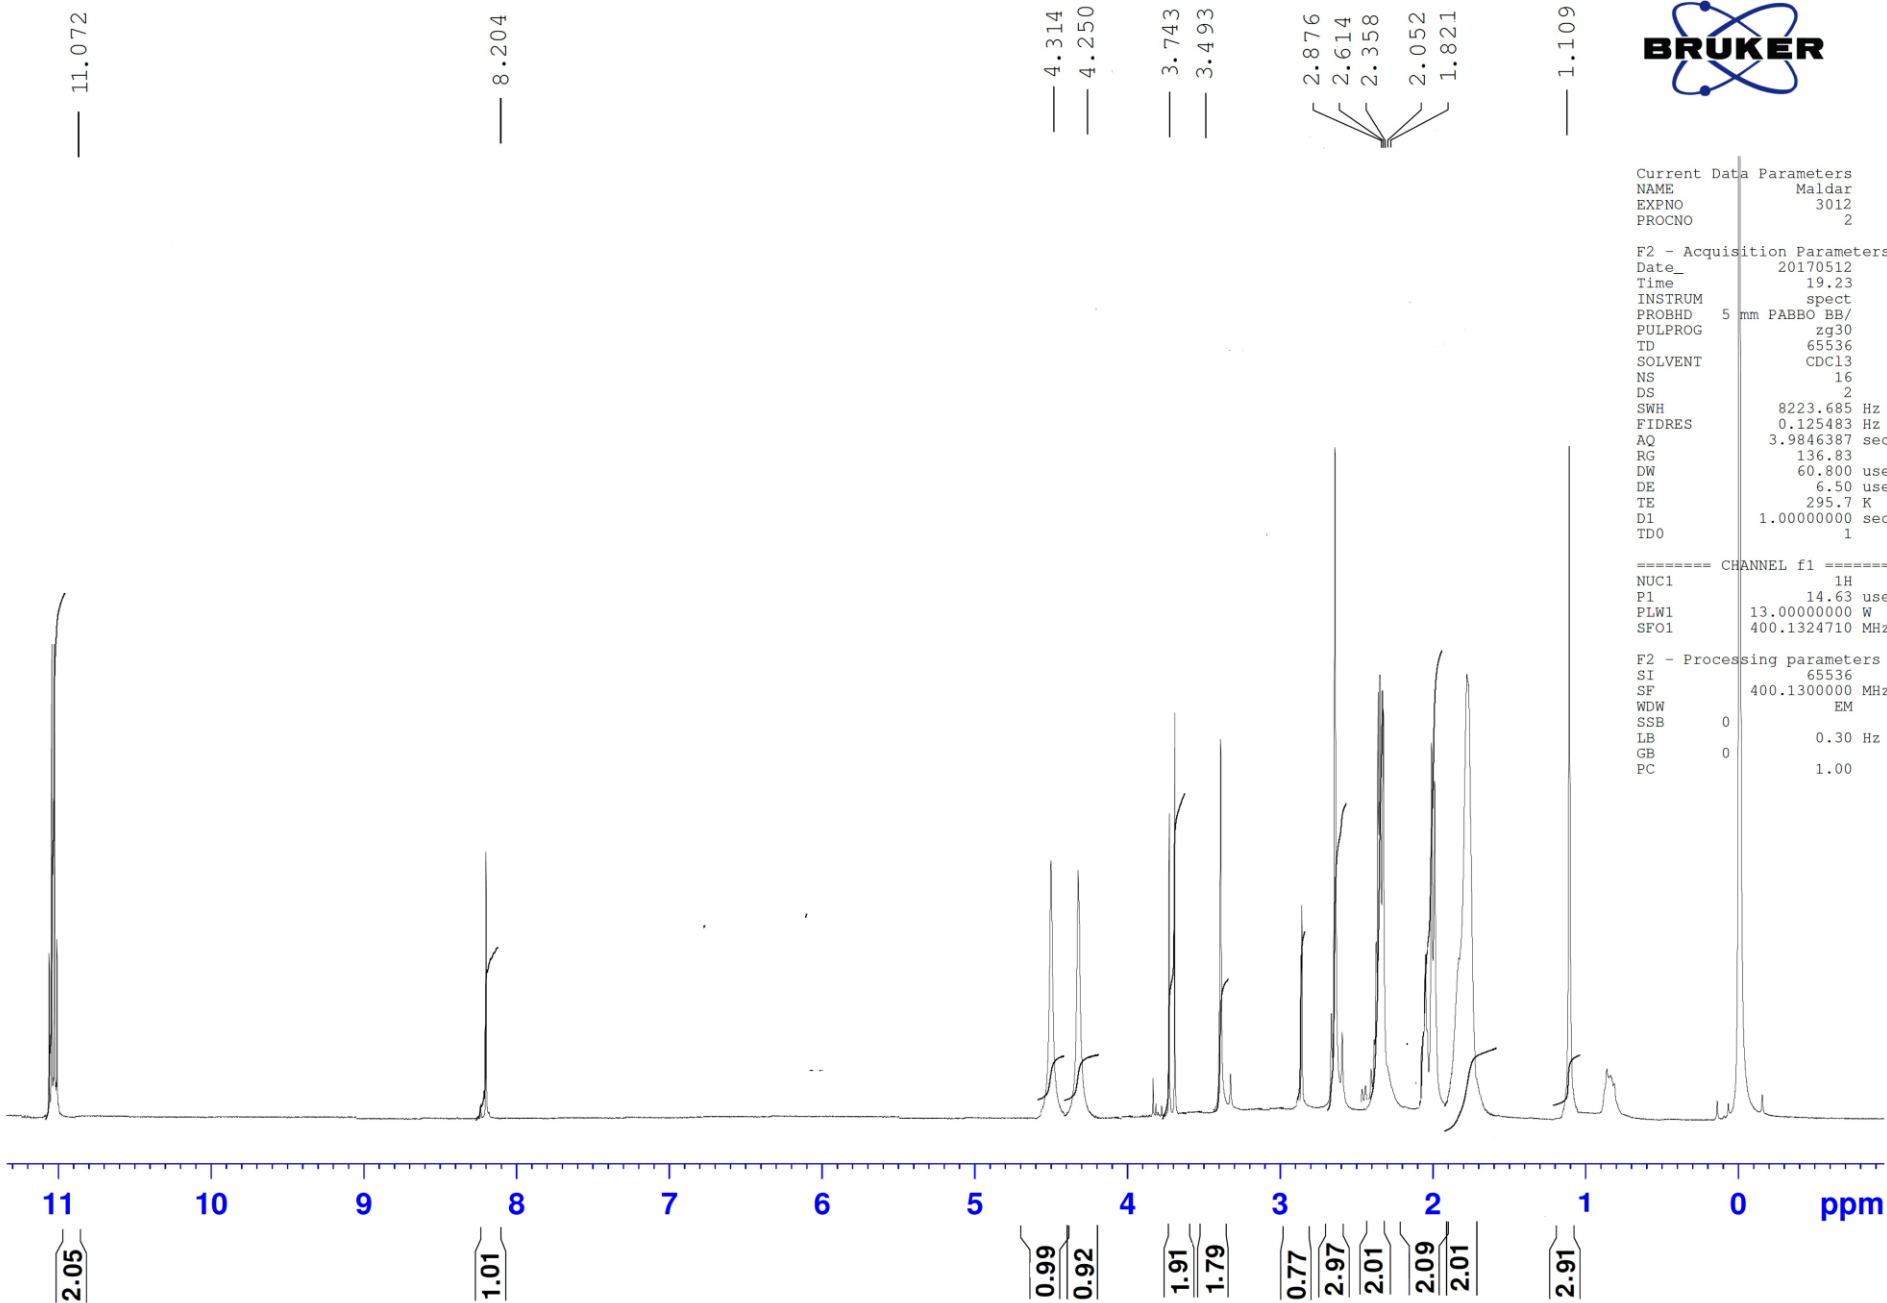

Supplement: c8nj03836h1.zip [file ACG NMR.pdf › SPECTRAL DATA/ACG NMR.pdf]
